# Supplementary material for: A New Acyl-homoserine Lactone Molecule Generated by Nitrobacter winogradskyi
Source: PubMed Central journal article supplement (PMC4786786; doi:10.1038/srep22903), 2016-03-11
Supplement: srep22903-s1.pdf [file srep22903-s1.pdf]

**A New Acyl-homoserine Lactone Molecule Generated by *Nitrobacter winogradskyi***

Qiuxuan Shen<sup>1\*</sup>, Jie Gao<sup>1\*</sup>, Jun Liu<sup>2</sup>, Shuangjiang Liu<sup>3</sup>, Zijun Liu<sup>1</sup>, Yinghuan Wang<sup>1</sup>,  
Baoyuan Guo<sup>1</sup>, Xuliang Zhuang<sup>1#</sup> & Guoqiang Zhuang<sup>1#</sup>

<sup>1</sup> CAS Key Laboratory of Environmental Biotechnology, Research Center for Eco-Environmental Sciences, Chinese Academy of Sciences, Beijing 100085, China

<sup>2</sup> State Key Laboratory of Environmental Chemistry and Ecotoxicology, Research Center for Eco-Environmental Sciences, Chinese Academy of Sciences, Beijing 100085, China

<sup>3</sup> State Key Laboratory of Microbial Resources, Institute of Microbiology, Chinese Academy of Sciences, Beijing 100101, China

\* These authors contributed equally to this work.

# Correspondence and requests for materials should be addressed to X.Z. (email: xlzhuang@rcees.ac.cn) or G.Z. (email: gqzhuang@rcees.ac.cn)

**Supplementary Table S1. Pharmacokinetic parameters of the decrease in the nitrite concentration decrease in the control and C10:1-HSL groups**

| Pharmacokinetic parameters   | Control group       | C10:1-HSL group     |
|------------------------------|---------------------|---------------------|
| First-order kinetic equation | $y=-0.1336x+5.1022$ | $y=-0.1442x+5.1077$ |
| $R^2$                        | 0.95705             | 0.97785             |
| k                            | 0.1336              | 0.1442              |
| $t_{1/2}$                    | 5.19                | 4.81                |

**Supplementary Table S2. Bacterial strains and plasmids used in this study**

| Strain or plasmid                                                   | Description                                                                                                                                      | Reference    |
|---------------------------------------------------------------------|--------------------------------------------------------------------------------------------------------------------------------------------------|--------------|
| Strains                                                             |                                                                                                                                                  |              |
| <i>Nitrobacter winogradskyi</i><br>ATCC 25391                       | Type strain                                                                                                                                      | ATCC         |
| <i>Escherichia coli</i> BL21(DE3)                                   | F <sup>-</sup> <i>ompT hsdS<sub>B</sub></i> (r <sub>B</sub> <sup>-</sup> m <sub>B</sub> <sup>-</sup> )<br><i>dcm gal λ</i> (DE3) Cm <sup>r</sup> | Promega      |
| <i>Agrobacterium tumefaciens</i><br>KYC55(pJZ372) (pJZ384) (pJZ410) | AHL biosensor strain, Tc <sup>r</sup> ,<br>Spe <sup>r</sup> , Gm <sup>r</sup>                                                                    | <sup>1</sup> |
| Plasmids                                                            |                                                                                                                                                  |              |
| pGEX-4T-1                                                           | <i>E. coli</i> cloning and<br>expression vector                                                                                                  | GE           |
| pGEX-nwII                                                           | <i>nwII</i> of <i>N. winogradskyi</i><br>expressed from<br>pGEX-4T-1 <i>tac</i> promoter                                                         | This study   |

**Supplementary Table S3. Primers used in the quantitative PCR**

| Locus tag | Gene name/description                                           | Primers                                                    |
|-----------|-----------------------------------------------------------------|------------------------------------------------------------|
| nwi0773   | cyt. C class 1                                                  | 5' TAAGGGTGATGCTGAGAACG (F)<br>5' CTTCATGGTCGGAGTGGG (R)   |
| nwi0774   | <i>nxA</i>                                                      | 5' CACTCCGCACTTTAATCGTA (F)<br>5' GCGCCAGATGAACCACAT (R)   |
| nwi0775   | <i>nX</i>                                                       | 5' TCAACTACGACGTACCCG (F)<br>5' TTACCGCCCGAAGATGCT (R)     |
| nwi0776   | <i>nxB</i>                                                      | 5' CGGTTCGCAGGTTTACGC (F)<br>5' CCGTCCTCACCACGCTTGTA (R)   |
| nwi0777   | <i>narJ</i>                                                     | 5' CGTGATCTGCGAAAGCAA (F)<br>5' CGTAAAGCATCTAGCACCTGA (R)  |
| nwi0778   | <i>nxC</i>                                                      | 5' GACTCCCACGGCACTTTA (F)<br>5' CCTGTAAGCCAGCGAAAC (R)     |
| nwi0779   | <i>nark</i>                                                     | 5' CAGCATTCCACTCGGTATTT (F)<br>5' CCCTGCTTAGACTTCGGATA (R) |
| nwi0780   | C4 dicarboxylic<br>acids/malic acid or<br>tellurium transporter | 5' CACGTCGTGGCGACTTAT (F)<br>5' CATGATCGTCAGGTTAGCG (R)    |

**A**

```

NwiI      MIIHIVTAENIGSYQYEMEQAYRLRHNVFDVEMGWDLRKPDGREDQDFDGRALHMLYIE
BjaI      MIHAI SAVNRHLYEDVLEQHFRLRHDIFVEERHWE TLRRPDGREWDSYDDED TVYLLALE
LasI      -MIVQIGRREEFDKLLGEMHKLRQAQVFKERKGVDS-VIDEMEDGVDALSPYMLIQE
          : . . : : : ** : * . * : * * * : * . : * *

NwiI      ED---RVLGYQRMLPSMRPHLLTEVLPHLCEG-DFFVGPPIWETRYCVTRQHRDRGRIL
BjaI      GR---RVVGGHRLYP TTKPSMMSEVFPHLAAVRGCPSDPLIWEWSRYFVVRDRRD-----
LasI      DTPEAQVFGCWRLDITGPYMLKNTFPPELLHGKEAPCSPHIWELESAFAINSGQKGLG-F
          : * . * * : : * : : . : * . * * * * : * : : : . :

NwiI      SPVGNLLL SAIWEVGLASGVQKIIEMNPLWLLRLVQLNFRVTPGLPQQIGKDSIIAVT
BjaI      GALNLQLMAAVQEFCLDQGIQVSAI METWVLPFRFHEAGFVVTPLGLPALVENAWTMAAT
LasI      SDCTLEAMRALARYSLQNDIQTLVTVTIVGVEKMMIRAGLDVSRFGPHLKIGIERAVALR
          . : * : . * . : : : : : : : : : * : * : : * :

NwiI      AAFDRRTLKKLQEVGRNIVPAIVAQPEADQRLRA-----
BjaI      VDIRRQTL DVLHDIRIGMPSIVQQDGPRLDAVARANL CGLAAAQRKSA
LasI      IELNAKTQIALYGGVLEQRLAVS-----
          : : * *


```

**B**

```

LasR      -----MALVDGFLELERSSGKLEWSAILQKMASDLGFSKILFGLLPKD---SQDYENA
NwiR      -MSRRITLDDTLTFIARVDKASTPAEIAADAVVDVARPLGFSHVLG IIPIPGMTAEQQISN
BjaR1     MSAVDYGREALDFIEGLGVYRKVPDAMNLEAAFGRFGPETIIIVTGLPNP---DQRFAQM
          : : : : : : : : : * * . : : * :

LasR      FIVGNYPAAVREHIDRAGYARVDFIVSHCTQSVLPIN---EPSIYQTRKQHEFFEEASA
NwiR      VVLRHWPKAWSERYFTKG YLFDDFTIQRVNTSTEPFLWSELEPTYRNT PAPTRVMGEARE
BjaR1     VLAKRWPAGVFNLYTQNNYDRFDHVVRLCRQSVNPFVWSEAPYDAELEPSAAEVMMNRAGD
          . : . : * * : * . * * * : * . * * * . . : . *

LasR      AGLVYQLT MPLHGARGELGALSLSVEAENRAEANRFIESVLP TLWMLKDYALQSGAGLAF
NwiR      FNLGCGFTVPMITLNGQTAGFSLASERA E VPSILR-----GQLQLIAMYAFARALG
BjaR1     FRMSRQFIVPIHGLTG YEAAVSLGGVHLDL NPRSK-----PALHLMAMYGFDIRRL
          : * : : * * . . * * . : : : : *

LasR      EHPVSKPVVLTSRKEVLQWCAIQKTSWEISVICNCSEANVNFHMGNIRRRKFGVTSRRVA
NwiR      QKYKPA PVNLTPREMDILQWMAECKSDWEISVILKVSEHLVDKIARQLRAKLNATNRQT
BjaR1     EPYPYSTRLTPREVISWASQCKSAWEIGEILHITQRTAEHLATAARKLGAVNRTHA
          : . . * * . * : : . * : * * * . * : : : . : * : . . * :

LasR      AIMAVNLGLITL
NwiR      VAVLRHNLIR-
BjaR1     VALAIRHKIINP
          . : * . : *


```

**Supplementary Figure S1. Sequence alignment of NwiI and NwiR.** The amino acid sequences of NwiI/R were compared to BjaI/R and LsaI/R, respectively. Identical and similar amino acid residues in the three proteins are indicated by asterisks and colons, respectively, and nine conserved residues in the LuxI/R family are highlighted in black boxes.

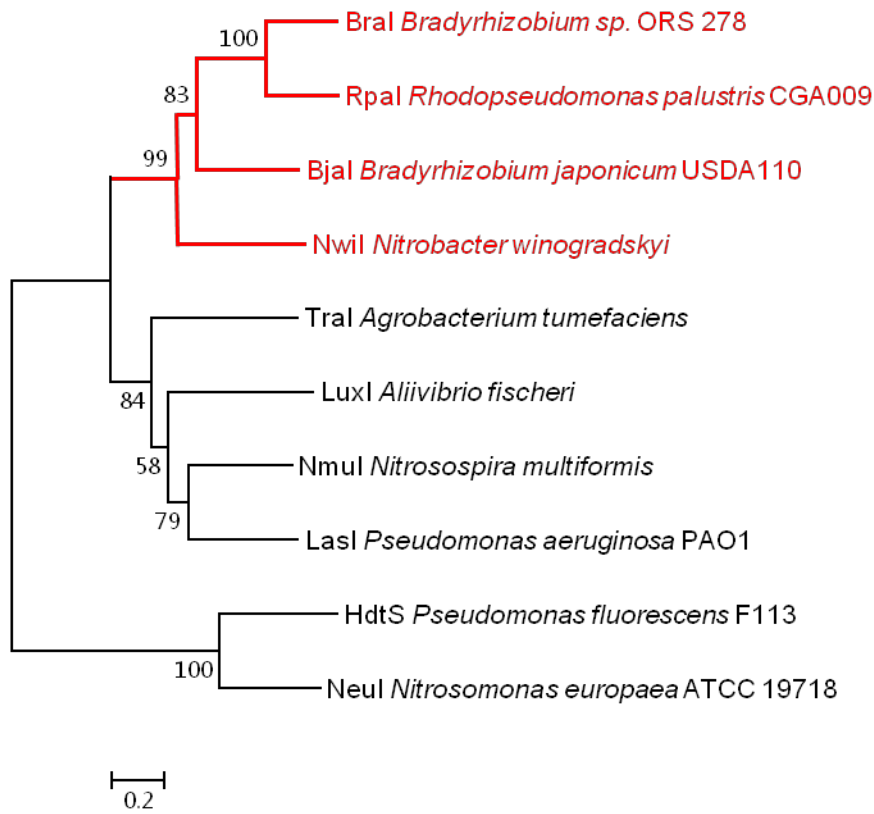

**Supplementary Figure S2. Phylogenetic tree of LuxI and HdtS family members.**

The scale bar indicates the number of substitutions per residue. Bootstrap values as the percentage of 500 samplings are shown for nodes with values of 50% or greater.

The subfamily tree of AHL synthases containing BraI, RapI, BjaI and NwiI is highlighted in red.

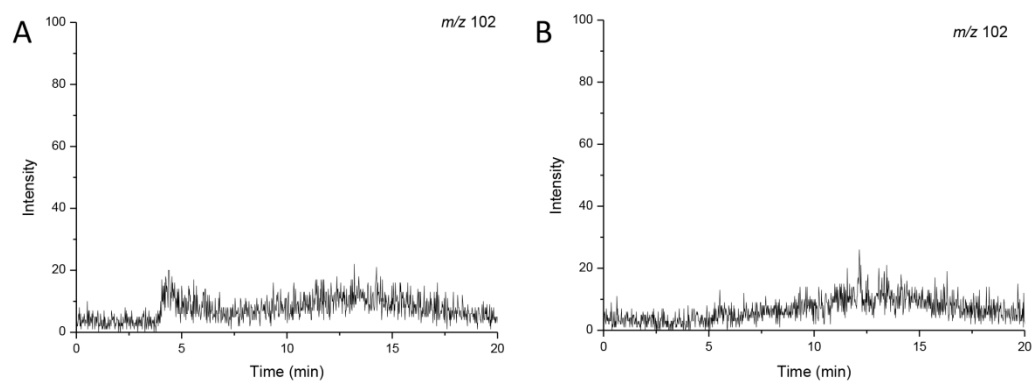

**Supplementary Figure S3. LC-MS chromatograms of LB and 756 medium. (A)**

LB medium. (B) 756 medium.

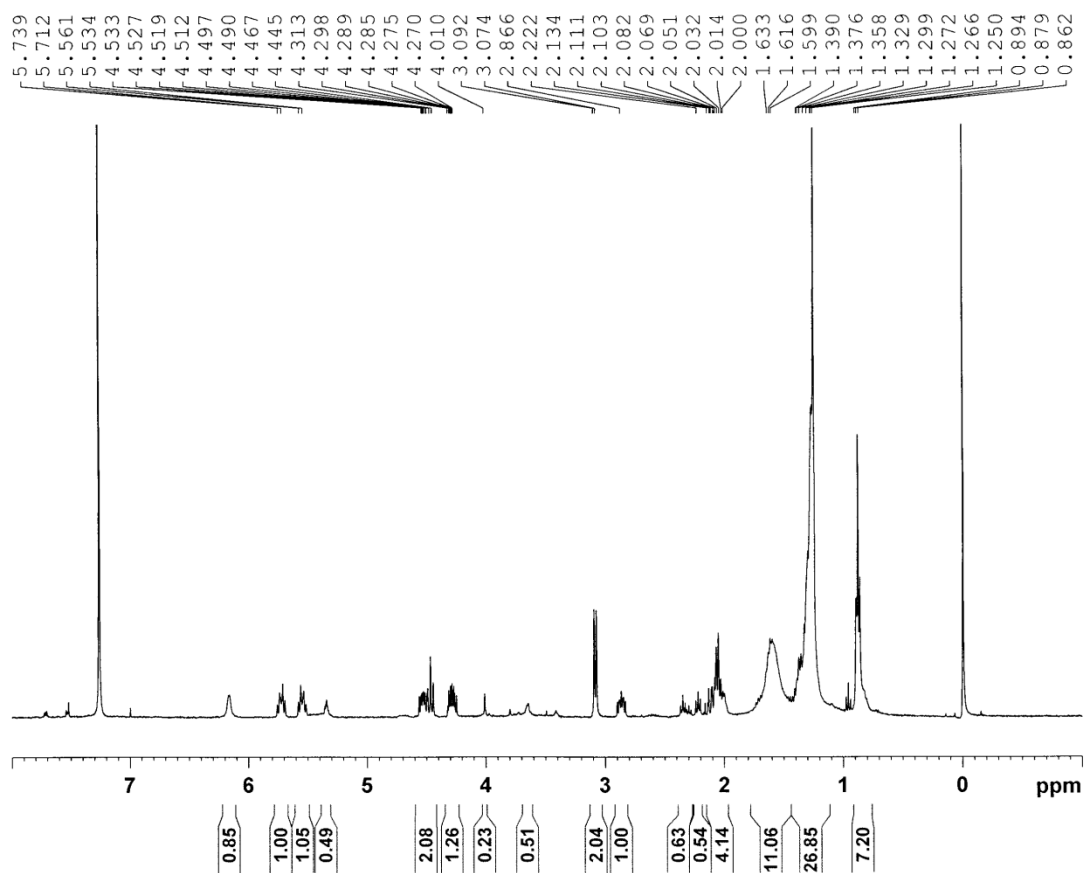

**Supplementary Figure S4.**  $^1\text{H}$  NMR purified from the extracts of recombinant *E. coli* strain contain *nwiI* gene.  $^1\text{H}$ -NMR ( $\text{CDCl}_3$ , 400 MHz) spectrum:  $\delta_{\text{H}}$  0.88(3H, t, a), 1.29(8H, m, b), 2.01(2H, m, c), 2.11(1H, m,  $\beta$ ), 2.86(1H, m,  $\beta$ ), 3.08(2H, d, e), 4.28(1H, m,  $\gamma$ ), 4.47(1H, t,  $\alpha$ ), 4.53(1H, m,  $\gamma$ ), 5.54(1H, m, d), 5.73(1H, m, d), 6.17(1H, m, f).



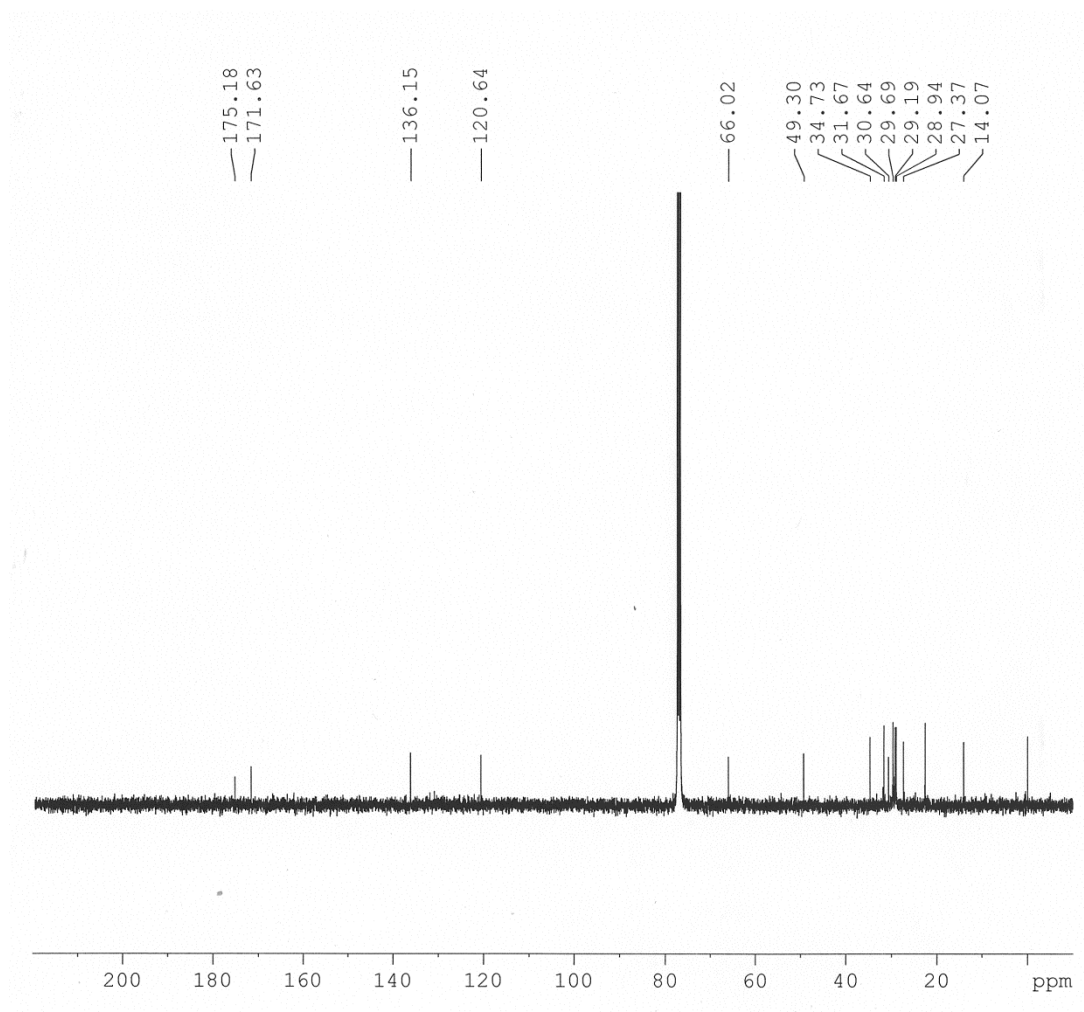

**Supplementary Figure S5. <sup>13</sup>C NMR purified from the extracts of recombinant *E. coli* strain contain *nwiI* gene. <sup>13</sup>C NMR (100MHz, CDCl<sub>3</sub>): δ 14.07, 27.37, 28.94, 29.19, 29.69, 30.64, 31.67, 34.73, 49.30, 66.02, 120.64, 136.15, 171.63, 175.18.**

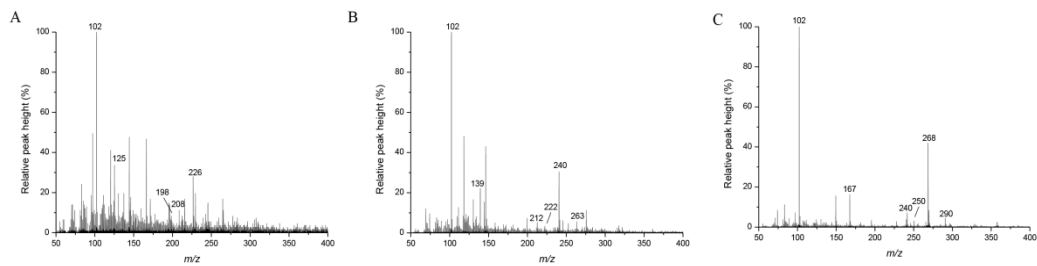

**Supplementary Figure S6. LC-MS chromatograms of putative AHLs molecules**

**in *E. coli* containing pGEX-nwiI. (A) C8:1-HSL, (B) C9:1-HSL, (C) C11:1-HSL.**

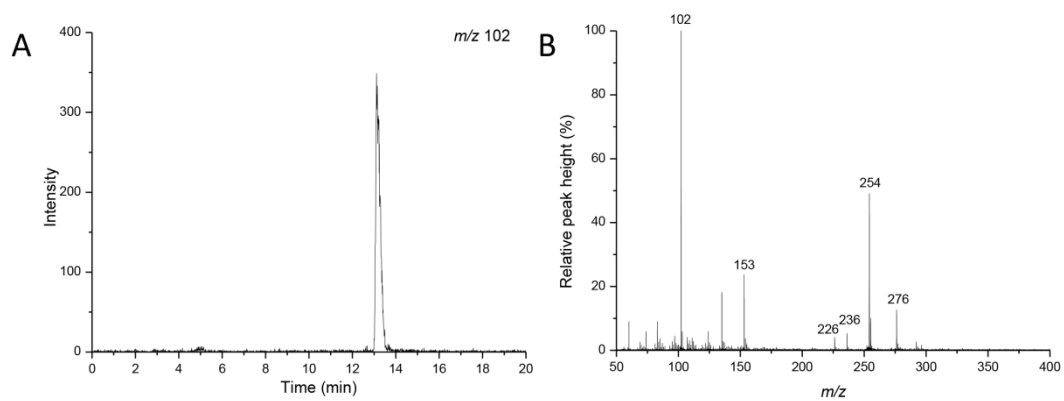

**Supplementary Figure S7. LC-MS chromatograms of C10:1-HSL obtained by preparative HPLC.** (A) Chromatogram of the lactone moiety at  $m/z$  102. (B) The mass spectra reveal molecular ion  $[M+H]$  of  $m/z$  254. The major fragmentation products with their respective  $m/z$  are labeled.

## Reference

- 1 Zhu, J., Chai, Y., Zhong, Z., Li, S. & Winans, S. C. *Agrobacterium* bioassay strain for ultrasensitive detection of *N*-acylhomoserine lactone-type quorum-sensing molecules: detection of autoinducers in *Mesorhizobium huakuii*. *Appl. Environ. Microbiol.* **69**, 6949-6953 (2003).
